# Supplementary material
Source: PubMed Central journal article supplement (PMC4104339)
Supplement: npp201471x1.pdf [file npp201471x1.pdf]

# Supplementary Material

Vonmoos M, Hulka LM, Preller KH, Minder F, Baumgartner MR, Quednow BB.

Cognitive impairment in cocaine users is drug-induced but partially reversible:  
evidence from a longitudinal study

**Methods S1.** Recruitment and selection.

**Methods S2.** Construction of cognitive domain scores.

**Table S1.** Demographic data and pattern of cocaine use for the cocaine user group with a stable use pattern.

**Table S2.** Correlations between self reported cocaine use parameters and the hair toxicology parameter cocaine<sub>total</sub>.

**Table S3.** Cognitive test scores at the baseline (t1) and the 1-year follow-up (t2).

**Table S4.** Test-retest effect adjusted and ADHD corrected cognitive change scores between baseline and one-year follow-up.

**Table S5.** Correlations between cognitive change scores and cocaine use parameters during the interval period.

**Table S6.** Demographic data and hair analysis in cocaine user subgroups.

**Figure S1.** Hair concentration cocaine<sub>total</sub> in cocaine increasers and decreaseers at baseline and one-year follow-up.

**Figure S2.** Development of cognitive functioning in all three cocaine user groups within one year.

**Figure S3.** Impact of cocaine urine toxicology status on global cognitive performance in cocaine increasers.

## **Methods S1. Recruitment and selection.**

The recruitment focused on the greater area of Zurich and lasted from January 2010 (start recruitment) until March 2013 (finish of the follow-up). Participants were recruited via advertisements in local newspapers, online media, drug prevention and treatment centers, psychiatric hospitals, and by word of mouth. Eight-hundred-and-four prospective participants underwent a standardized telephone interview, whereof 240 subjects were tested in the cross-sectional study. Six participants were not re-invited to participate in the follow-up study (refusal study participation, psychiatric disorders or first-grade family member with schizophrenia). The remaining 234 participants (138 cocaine users, 96 controls) were contacted and invited for a follow-up test session twelve months after baseline testing. One-hundred-and-two participants (59 cocaine users, 43 controls) were not available for the follow-up study due to different reasons (not answering, losing interest, time reasons, death). One-hundred-and-thirty-two participants (56%; 79 cocaine users, 53 controls) agreed to be re-tested and participated in the follow-up. Twenty-seven of these subjects (22 cocaine users, 5 controls) had to be excluded from the final analyses due to hair analyses revealing illegal drug use not allowed by our exclusion criteria (e.g., opioids or excessive MDMA intake) or due to starting use of psychotropic medication (e.g., antipsychotics or antidepressants).

## **Methods S2. Construction of cognitive domain scores.**

Thirteen predefined main cognitive test parameters were z-transformed on the basis of means and standard deviations of the control group ( $n=48$ ) at t1. If necessary, test scores were reversed so that high scores always indicated a better cognitive performance. These parameters were reduced to the four cognitive domains attention, working memory, declarative memory, and executive functions according to theoretical a priori considerations and in accordance with previous literature findings as cited below. Furthermore, the four z-scored domains were equally integrated into a broad global cognitive index (GCI). Apart from the non-consideration of two CANTAB Intra/Extradimensional Set Shifting Task (IED) parameters, we used exactly the same approach as in the previously published cross-sectional study (Vonmoos *et al*, 2013).

### **Attention**

To assess attention, we primarily focused on sustained attention by including the two RVP parameters discrimination performance A' and total of hits (Jones *et al*, 1992). In order to diversify this domain, we further added the RAVLT parameter trial 1, a supraspan measure with a strong attentional component (Lezak *et al*, 2004).

### **Working memory**

The SWM parameter total errors tested the capability to retain spatial information and to manipulate remembered items in the working memory (Morris *et al*, 1988). The LNST score measured verbal working memory by summing up the number of correct responses (Wechsler, 1997). The PAL first trial memory score measured visual working memory by counting the number of correctly located patterns after the first presentation (Sahakian *et al*, 1988).

### **Declarative memory**

Three RAVLT parameters were included to assess the verbal declarative memory performance:  $\sum$  trials 1-5, delayed recall trial 7, and adjusted recognition performance p(A). Furthermore, the two PAL parameters (adjusted total of errors and adjusted total of trials) were used to capture visual declarative memory (Sahakian *et al*, 1988).

### **Executive functions**

Because we excluded the CANTAB IED from the longitudinal analysis due to an evident ceiling effect at baseline (Vonmoos *et al*, 2013), the executive functions were measured by only two parameters. First, the SWM strategy score assessed the applied heuristic strategies (Morris *et al*, 1988), a typical feature of the executive functions. Second, the RAVLT recall consistency score is a parameter typically impaired in patients with prefrontal lesions (Benedict *et al*, 2005; Jokeit *et al*, 1997) and related with measures of executive functions (Beebe *et al*, 2000).

**Table S1.** Demographic data and pattern of drug use for the cocaine user group with a *stable* use pattern.

|                                      | Baseline (t1)    | 1-year follow-up (t2) <sup>h</sup> |
|--------------------------------------|------------------|------------------------------------|
| Age, y                               | 27.0 (5.6)       |                                    |
| Sex (f/m)                            | 8/11             |                                    |
| Verbal IQ (MWT-B) <sup>a</sup>       | 104.5 (9.1)      |                                    |
| Education, y                         | 10.3 (1.6)       |                                    |
| ADHD-SR score (0-22)                 | 14.4 (10.2)      |                                    |
| ADHD DSM IV (y/n) <sup>b</sup>       | 4/15             |                                    |
| Weeks between t1 and t2              | 64.8 (16.3)      |                                    |
| BDI score (0-63)                     | 8.1 (6.2)        |                                    |
| BDI depression (y/n) <sup>d</sup>    | 2/17             |                                    |
| <b>Cocaine</b>                       |                  |                                    |
| Times per week <sup>e</sup>          | 0.6 (0.6)        | 0.3 (0.2)                          |
| Grams per week <sup>e</sup>          | 0.7 (0.6)        | 0.2 (0.3)                          |
| Years of use                         | 5.4 (5.0)        | 6.3 (5.6)                          |
| Max. dose (grams/day) <sup>k</sup>   | 3 (3.1)          | 1.7 (1.5)                          |
| Cumulative dose (grams) <sup>k</sup> | 394 (563)        | 18 (25.4)                          |
| Last consumption (days)              | 42.2 (49.7)      | 58.2 (116.6)                       |
| Cocaine craving (0-70) <sup>f</sup>  | 18.4 (7.7)       | 15.1 (7.7)                         |
| Hair analysis, ng/mg                 |                  |                                    |
| Cocaine <sup>total</sup>             | 3.2 (9.9)        | 3.2 (9.4)                          |
| Cocaine                              | 2.5 (7.6)        | 2.6 (7.9)                          |
| Benzoylcegonine                      | 0.6 (1.9)        | 0.5 (1.2)                          |
| Cocaethylene                         | 0.3 (0.8)        | 0.7 (2.1)                          |
| Benzoylcegonine                      | 0.1 (0.3)        | 0.1 (0.3)                          |
| Urine toxicology (n/p) <sup>g</sup>  | 18/1             | 16/3                               |
| <b>Alcohol<sup>k</sup></b>           |                  |                                    |
| Grams per week <sup>e</sup>          | 132.3 (86.4)     | 146.7 (95.1)                       |
| Years of use                         | 9.9 (5.0)        | 11.1 (5.5)                         |
| <b>Nicotine<sup>k</sup></b>          |                  |                                    |
| Smoking (y/n) <sup>c</sup>           | 14/5             | 15/4                               |
| Cigarettes per day <sup>e</sup>      | 12.2 (8.3)       | 12.7 (8.9)                         |
| Years of use                         | 9.2 (6.3)        | 9.5 (6.7)                          |
| <b>Cannabis<sup>k</sup></b>          |                  |                                    |
| Grams per week <sup>e</sup>          | 1.2 (2.6)        | 0.9 (1.6)                          |
| Years of use                         | 7.8 (5.9)        | 8.4 (6.2)                          |
| Cumulative dose (grams)              | 1932.7 (4309.1)  | 55.0 (94.7)                        |
| Last consumption (days) <sup>i</sup> | 28.7 (41.1);n=15 | 18.7 (33.1);n=13                   |
| Urine toxicology (n/p) <sup>g</sup>  | 16/3             | 15/4                               |
| <b>Amphetamine<sup>k</sup></b>       |                  |                                    |
| Grams per week <sup>e</sup>          | 0.0 (0.1)        | 0.0 (0.1)                          |
| Years of use                         | 1.4 (3.0)        | 1.9 (3.5)                          |
| Cumulative dose (grams)              | 2.8 (5.8)        | 1.9 (6)                            |
| Last consumption (days) <sup>i</sup> | 61.8 (59.6);n=7  | 65.9 (23.2);n=3                    |
| Hair analysis ng/mg                  | 0.0 (0.0)        | 0.0 (0.0)                          |
| <b>MDMA<sup>k</sup></b>              |                  |                                    |
| Tablets per week <sup>e</sup>        | 0.0 (0.0)        | 0.1 (0.1)                          |
| Years of use                         | 2.1 (3.8)        | 2.6 (4.3)                          |
| Cumulative dose (tablets)            | 14.6 (39.9)      | 4.3 (7.1)                          |
| Last consumption (days) <sup>i</sup> | 56.4 (43.4);n=6  | 69.7 (36.4);n=8                    |
| Hair analysis ng/mg                  | 0.2 (0.5)        | 0.2 (0.4)                          |
| <b>GHB<sup>k</sup></b>               |                  |                                    |
| Cumulative dose (pipettes)           | 4.5 (17.8)       | 1.2 (5.2)                          |
| <b>Hallucinogens<sup>k</sup></b>     |                  |                                    |
| Cumulative dose (times)              | 6.3 (14.3)       | 0.4 (0.8)                          |
| <b>Methylphenidate<sup>k</sup></b>   |                  |                                    |
| Cumulative dose (tablets)            | 41.3 (144.6)     | 1.5 (4.6)                          |
| Hair analysis ng/mg                  | 0.0 (0.0)        | 0.0 (0.0)                          |

Means and standard deviations.

<sup>a</sup> Verbal IQ was assessed by the Mehrfachwahl Wortschatz Intelligenztest (Lehrl, 1999).

<sup>b</sup> ADHD-SR, ADHD self rating scale (cut-off DSM-IV criteria)(Roesler *et al*, 2004).

<sup>c</sup> Smoking habits were assessed by the Fagerstroem Test of Nicotine Dependence (Heatherton *et al*, 1991).

<sup>d</sup> BDI, Beck Depression Inventory (cut-off  $\geq 18$ )(Hautzinger *et al*, 1994).

<sup>e</sup> Average use during the last 6 months.

<sup>f</sup> Craving for cocaine was assessed by the Brief-CCQ (Sussner *et al*, 2006).

<sup>g</sup> Cut-off values for cocaine = 150 ng/ml and for tetrahydrocannabinol = 50 ng/ml (Substance Abuse and Mental Health Services Administration, 2008).

<sup>h</sup> Parameters at follow-up refer to the 1-year period between t1 and t2.

<sup>i</sup> Last consumption is averaged only for persons who used the drug in the last 6 months.

<sup>k</sup> Use frequency, duration of use, and cumulative doses are averaged within the total group.

**Table S2.** Correlations between self reported cocaine use parameters and the hair toxicology parameter cocaine<sub>total</sub>

|                                                | Cocaine Users<br>(n=38)               | Cocaine<br>Increasesers<br>(n=19) | Cocaine<br>Decreasers<br>(n=19) |
|------------------------------------------------|---------------------------------------|-----------------------------------|---------------------------------|
| <i>Cocaine self-report at baseline</i>         | Cocaine <sub>total</sub> <sup>a</sup> | Cocaine <sub>total</sub>          | Cocaine <sub>total</sub>        |
| Times per week                                 | .18                                   | *.48                              | -.16                            |
| Grams per week                                 | -.04                                  | .12                               | -.18                            |
| Years of use                                   | *.38                                  | .39                               | .35                             |
| Max. dose (grams/day)                          | *.39                                  | -.06                              | ** .67                          |
| Cumulative dose lifetime (grams)               | ** .48                                | .22                               | ** .62                          |
| <i>Cocaine self-report at 1-year follow-up</i> | Cocaine <sub>total</sub> <sup>a</sup> | Cocaine <sub>total</sub>          | Cocaine <sub>total</sub>        |
| Times per week                                 | .14                                   | -.05                              | .03                             |
| Grams per week                                 | .08                                   | -.04                              | .16                             |
| Years of use                                   | .07                                   | .12                               | .28                             |
| Max. dose (grams/day)                          | .29                                   | .40                               | .06                             |
| Cumulative dose in the last year (grams)       | .02                                   | -.06                              | -.01                            |

Pearson's product-moment correlations in cocaine users (n=38). Significant correlations are marked: \*p<.05; \*\*p<.01.

Cocaine parameters at 1-year follow-up refer to the period between t1 and t2.

<sup>a</sup> Cocaine<sub>total</sub> = Cocaine + Benzoylcegonine + Norcocaine.

**Table S3.** Cognitive test scores at the baseline (t1) and the 1-year follow-up (t2).

|                                                          | Baseline (t1)      |                                |                                |                |                          |             |                           | 1-year follow-up (t2) |                                |                                |                |                          |             |                           |
|----------------------------------------------------------|--------------------|--------------------------------|--------------------------------|----------------|--------------------------|-------------|---------------------------|-----------------------|--------------------------------|--------------------------------|----------------|--------------------------|-------------|---------------------------|
|                                                          | Controls<br>(n=48) | Cocaine<br>Increaser<br>(n=19) | Cocaine<br>Decreaser<br>(n=19) | F <sup>a</sup> | df,<br>df <sub>err</sub> | p           | Part.<br>Eta <sup>2</sup> | Controls<br>(n=48)    | Cocaine<br>Increaser<br>(n=19) | Cocaine<br>Decreaser<br>(n=19) | F <sup>a</sup> | df,<br>df <sub>err</sub> | p           | Part.<br>Eta <sup>2</sup> |
| <i>Attention</i>                                         |                    |                                |                                |                |                          |             |                           |                       |                                |                                |                |                          |             |                           |
| RVP Discrimination perf. A <sup>1</sup>                  | 0.92 (0.04)        | 0.90 (0.04)                    | 0.90 (0.04)                    | 1.92           | 2,83                     | .15         | .04                       | 0.93 (0.04)           | 0.91 (0.04)                    | 0.92 (0.04)                    | 2.00           | 2,83                     | .14         | .05                       |
| RVP Total hits                                           | 18.35 (4.21)       | 16.26 (4.62)                   | 16.79 (4.38)                   | 1.95           | 2,83                     | .15         | .04                       | 19.98 (4.19)          | 17.79 (4.77)                   | 18.63 (3.85)                   | 2.02           | 2,83                     | .14         | .05                       |
| RAVLT Supraspan trial 1 <sup>b</sup>                     | 9.38 (2.47)        | 8.47 (2.2)                     | 8.26 (2.18)                    | 1.99           | 2,82                     | .14         | .05                       | 9.66 (2.43)           | 8.68 (2.08)                    | 9.37 (2.87)                    | 1.06           | 2,82                     | .35         | .03                       |
| <i>Working memory</i>                                    |                    |                                |                                |                |                          |             |                           |                       |                                |                                |                |                          |             |                           |
| LNST Score                                               | 15.54 (2.92)       | 14.00 (3.48)                   | 14.00 (2.56)                   | 2.84           | 2,83                     | .06         | .06                       | 15.69 (3.10)          | 13.74 (3.11)                   | 14.32 (2.94)                   | 3.27           | 2,83                     | <b>.04</b>  | .07                       |
| SWM Total errors                                         | 20.31 (16.38)      | 27.11 (19.75)                  | 26.95 (19.77)                  | 1.49           | 2,83                     | .23         | .03                       | 13.52 (14.14)         | 25.53 (15.99)*                 | 20.84 (15.64)                  | 4.94           | 2,83                     | <b>.009</b> | .11                       |
| PAL First trial memory score                             | 15.48 (3.87)       | 13.84 (4.26)                   | 13.58 (2.43)                   | 2.45           | 2,83                     | .09         | .06                       | 16.42 (3.08)          | 13.95 (3.63)*                  | 15.63 (3.70)                   | 3.71           | 2,83                     | <b>.03</b>  | .08                       |
| <i>Declarative memory</i>                                |                    |                                |                                |                |                          |             |                           |                       |                                |                                |                |                          |             |                           |
| RAVLT Learning perf. ( $\Sigma$ trials 1-5) <sup>b</sup> | 63.38 (6.53)       | 57.37 (9.66)*                  | 57.84 (10.30)*                 | 5.19           | 2,82                     | <b>.008</b> | .11                       | 64.40 (6.64)          | 58.26 (10.55)*                 | 62 (10.00)                     | 3.63           | 2,82                     | <b>.03</b>  | .08                       |
| RAVLT Adjusted recognition p(A) <sup>b</sup>             | 0.87 (0.11)        | 0.84 (0.19)                    | 0.85 (0.14)                    | .54            | 2,82                     | .59         | .01                       | 0.87 (0.11)           | 0.84 (0.16)                    | 0.86 (0.18)                    | .31            | 2,82                     | .73         | .01                       |
| RAVLT Delayed recall trial 7 <sup>b</sup>                | 13.19 (2.00)       | 12.00 (3.04)                   | 11.89 (2.92)                   | 2.66           | 2,82                     | .08         | .06                       | 13.66 (1.77)          | 12.05 (3.66)                   | 13.42 (2.39)                   | 3.00           | 2,82                     | .06         | .07                       |
| PAL Total errors adjusted                                | 11.96 (13.76)      | 19.32 (15.73)                  | 15.00 (12.11)                  | 1.95           | 2,83                     | .15         | .04                       | 6.96 (6.69)           | 18.47 (16.17)**                | 11.74 (17.59)                  | 6.17           | 2,83                     | <b>.003</b> | .13                       |
| PAL Total trials adjusted                                | 8.71 (3.44)        | 10.74 (4.01)                   | 9.63 (3.29)                    | 2.31           | 2,83                     | .11         | .05                       | 7.88 (2.20)           | 10.37 (4.09)**                 | 8.47 (3.61)                    | 4.62           | 2,83                     | <b>.01</b>  | .10                       |
| <i>Executive functions</i>                               |                    |                                |                                |                |                          |             |                           |                       |                                |                                |                |                          |             |                           |
| SWM Strategy score                                       | 32.27 (6.13)       | 33.53 (6.28)                   | 33.00 (5.45)                   | .32            | 2,83                     | .72         | .01                       | 29.54 (6.03)          | 31.47 (6.81)                   | 32.89 (4.41)                   | 2.40           | 2,83                     | .10         | .05                       |
| RAVLT Recall consistency (%)                             | 93.05 (5.75)       | 87.54 (9.84)*                  | 87.70 (8.61)*                  | 5.52           | 2,82                     | <b>.006</b> | .12                       | 93.43 (6.34)          | 88.76 (10.97)                  | 91.61 (6.06)                   | 2.61           | 2,82                     | .08         | .06                       |

Means and standard deviations. Significant p values are shown in bold.

<sup>a</sup>ANOVA (all groups, with significant Sidak post-hoc test vs. control group: \*p<.05; \*\*p<.01; \*\*\*p<.001).

<sup>b</sup>In the RAVLT task, the value for one control subject is missing due to a technical failure.

**Table S4.** Test-retest effect adjusted and ADHD corrected cognitive change scores between baseline (t1) and one-year follow-up (t2).

| Change scores ( $\Delta_{t2-t1}$ )        | Cocaine Increases<br>(n=19) | Cocaine Decreases<br>(n=19) |
|-------------------------------------------|-----------------------------|-----------------------------|
| Global Cognitive Index                    | -0.09 (0.10)                | 0.15 (0.10)                 |
| <i>Neurocognitive domains</i>             |                             |                             |
| Attention                                 | -0.02 (0.15)                | 0.16 (0.15)                 |
| Working memory                            | -0.22 (0.10)                | 0.10 (0.10)                 |
| Declarative memory                        | -0.14 (0.18)                | 0.23 (0.18)                 |
| Executive functions                       | 0.02 (0.17)                 | 0.11 (0.17)                 |
| <i>Attention</i>                          |                             |                             |
| RVP Discrimination perf. A'               | 0.00 (0.01)                 | 0.00 (0.01)                 |
| RVP Total hits                            | -0.10 (0.78)                | 0.22 (0.78)                 |
| RAVLT Supraspan trial 1                   | -0.10 (0.55)                | 0.86 (0.55)                 |
| <i>Working memory</i>                     |                             |                             |
| LNST Score                                | -0.40 (0.64)                | 0.16 (0.64)                 |
| SWM Total errors                          | 5.14 (2.99)                 | 0.76 (2.99)                 |
| PAL First trial memory score              | -0.83 (0.82)                | 1.12 (0.82)                 |
| <i>Declarative memory</i>                 |                             |                             |
| RAVLT Learning perf. ( $\sum$ trials 1-5) | -0.24 (1.79)                | 3.25 (1.79)                 |
| RAVLT Adjusted recognition p(A)           | 0.01 (0.04)                 | 0.02 (0.04)                 |
| RAVLT Delayed recall trial 7              | -0.44 (0.53)                | 1.08 (0.53)                 |
| PAL Total errors adjusted                 | 4.25 (2.64)                 | 1.65 (2.64)                 |
| PAL Total trials adjusted                 | 0.49 (0.66)                 | -0.35 (0.66)                |
| <i>Executive functions</i>                |                             |                             |
| SWM Strategy score                        | 0.66 (0.96)                 | 2.64 (0.96)                 |
| RAVLT Recall consistency in %             | 0.73 (1.58)                 | 3.64 (1.58)                 |

Mean change scores and standard errors (values corrected for ADHD). Change scores are adjusted for the test-retest effect.

**Table S5.** Correlations between cognitive change scores and cocaine use parameters during the interval period.

| Change scores ( $\Delta_{t2-t1}$ )        | Cocaine use during the interval period<br>(between baseline and 1-year follow-up) |                                                    |
|-------------------------------------------|-----------------------------------------------------------------------------------|----------------------------------------------------|
|                                           | Cumulative dose<br>(grams)                                                        | Hair analysis<br>Cocaine <sub>total</sub><br>ng/mg |
| <i>Attention</i>                          |                                                                                   |                                                    |
| RVP Discrimination perf. A'               | *.36                                                                              |                                                    |
| RVP Total hits                            | *.34                                                                              |                                                    |
| RAVLT Supraspan trial 1                   |                                                                                   |                                                    |
| <i>Declarative memory</i>                 |                                                                                   |                                                    |
| RAVLT Learning perf. ( $\sum$ trials 1-5) | .31                                                                               |                                                    |
| RAVLT Adjusted recognition p(A)           |                                                                                   | *-.39                                              |
| RAVLT Delayed recall trial 7              | ** .44                                                                            | -.28                                               |
| PAL Total errors adjusted                 |                                                                                   |                                                    |
| PAL Total trials adjusted                 |                                                                                   |                                                    |

Pearson's product-moment correlations in cocaine users ( $n=35$ ).

Correlations with a p-level below 10% (2-tailed) are shown, while significant correlations are marked: \* $p < .05$ ; \*\* $p < .01$ .

Three cocaine users with more than 4 standard deviations difference in cumulative doses or cocaine<sub>total</sub> were excluded.

**Table S6.** Demographic data and hair analysis in cocaine user subgroups.

|                                                          | Controls<br>(n=48) | Cocaine<br>Increaseers<br>low, <10 ng/mg<br>(n=11) | Cocaine<br>Increaseers<br>high, >10 ng/mg<br>(n=8) | Cocaine<br>Decreasers<br>ongoing use<br>(n=11) | Cocaine<br>Decreasers<br>no more use<br>(n=8) | F                 | df,df <sub>err</sub> | p               |
|----------------------------------------------------------|--------------------|----------------------------------------------------|----------------------------------------------------|------------------------------------------------|-----------------------------------------------|-------------------|----------------------|-----------------|
| Global Cognitive Index ( $\Delta_{t2-t1}$ ) <sup>d</sup> | 0.00 (0.38)        | -0.04 (0.48)                                       | -0.15 (0.42)                                       | 0.04 (0.51)                                    | 0.29 (0.34)                                   | 1.3 <sup>a</sup>  | 4,81                 | .28             |
| <i>Demographic data</i>                                  |                    |                                                    |                                                    |                                                |                                               |                   |                      |                 |
| Age, y                                                   | 30.3 (8.9)         | 29.5 (8.5)                                         | 34.3 (10.4)                                        | 33.5 (9.3)                                     | 28.5 (6.0)                                    | .80 <sup>a</sup>  | 4,81                 | .53             |
| Sex (f/m)                                                | 16/32              | 3/8                                                | 0/8                                                | 3/8                                            | 2/6                                           | 3.84 <sup>b</sup> | 4                    | .43             |
| Verbal IQ (MWT-B)                                        | 107.6 (10.0)       | 104.1 (12.1)                                       | 101.3 (5.5)                                        | 102.6 (8.5)                                    | 105.4 (4.7)                                   | 1.28 <sup>a</sup> | 4,81                 | .28             |
| Education, y                                             | 10.8 (1.8)         | 10.7 (2.0)                                         | 10.0 (1.6)                                         | 10.3 (1.8)                                     | 9.6 (1.1)                                     | .99 <sup>a</sup>  | 4,81                 | .42             |
| Smoking (y/n)                                            | 37/11              | 9/2                                                | 5/3                                                | 8/3                                            | 6/2                                           | 1.08 <sup>b</sup> | 4                    | .90             |
| BDI score (0-63)                                         | 3.5 (3.3)          | 7 (4.5)                                            | 7.8 (11.5)                                         | 8.5 (7.9)                                      | 9.0 (4.6)                                     | 3.72 <sup>a</sup> | 4,81                 | <b>.008</b>     |
| ADHD-SR score (0-22)                                     | 7.7 (5.2)          | 12.5 (9.4)                                         | 14.9 (9.8)                                         | 13.3 (6.7)                                     | 15.1 (7.3)*                                   | 4.60 <sup>a</sup> | 4,81                 | <b>.002</b>     |
| Weeks between t1 and t2                                  | 58.2 (10.1)        | 58.4 (11.0)                                        | 60.6 (14.2)                                        | 62.4 (13.9)                                    | 61.2 (16.4)                                   | .39 <sup>a</sup>  | 4,81                 | .81             |
| <i>Hair analysis cocaine<sub>total</sub> ng/mg</i>       |                    |                                                    |                                                    |                                                |                                               |                   |                      |                 |
| t1                                                       | -                  | 2.9 (3.0)                                          | 20.3 (44.6)                                        | 23.8 (40.7)                                    | 2.6 (2.6)                                     | 1.37 <sup>c</sup> | 3,34                 | .27             |
| t2                                                       | -                  | 5.8 (3.4) <sup>°</sup>                             | 88.7 (101.6)                                       | 7.2 (9.9) <sup>°</sup>                         | 0.1 (0.2) <sup>°</sup>                        | 6.90 <sup>c</sup> | 3,34                 | <b>&lt;.001</b> |
| $\Delta_{t2-t1}$                                         | -                  | +2.9 (2.4) <sup>°</sup>                            | +68.3 (83.8)                                       | -16.6 (34.5) <sup>°°</sup>                     | -2.5 (2.6) <sup>°</sup>                       | 6.82 <sup>c</sup> | 3,34                 | <b>.001</b>     |

<sup>a</sup> ANOVA (all groups, with significant Sidak post-hoc test vs. control group: \* $p < .05$ ).<sup>b</sup>  $\chi^2$  test (all groups) for frequency data.<sup>c</sup> ANOVA (only cocaine user groups, with significant Sidak post-hoc test vs. subgroup cocaine increaser high: <sup>°</sup> $p < .05$ ; <sup>°°</sup> $p < .01$ ; <sup>°°°</sup> $p < .001$ ).<sup>d</sup> GCI change scores are adjusted for the test-retest effect.



**Figure S1.** Hair concentration cocaine<sub>total</sub> in three cocaine user groups at baseline (t1) and one-year follow-up (t2).

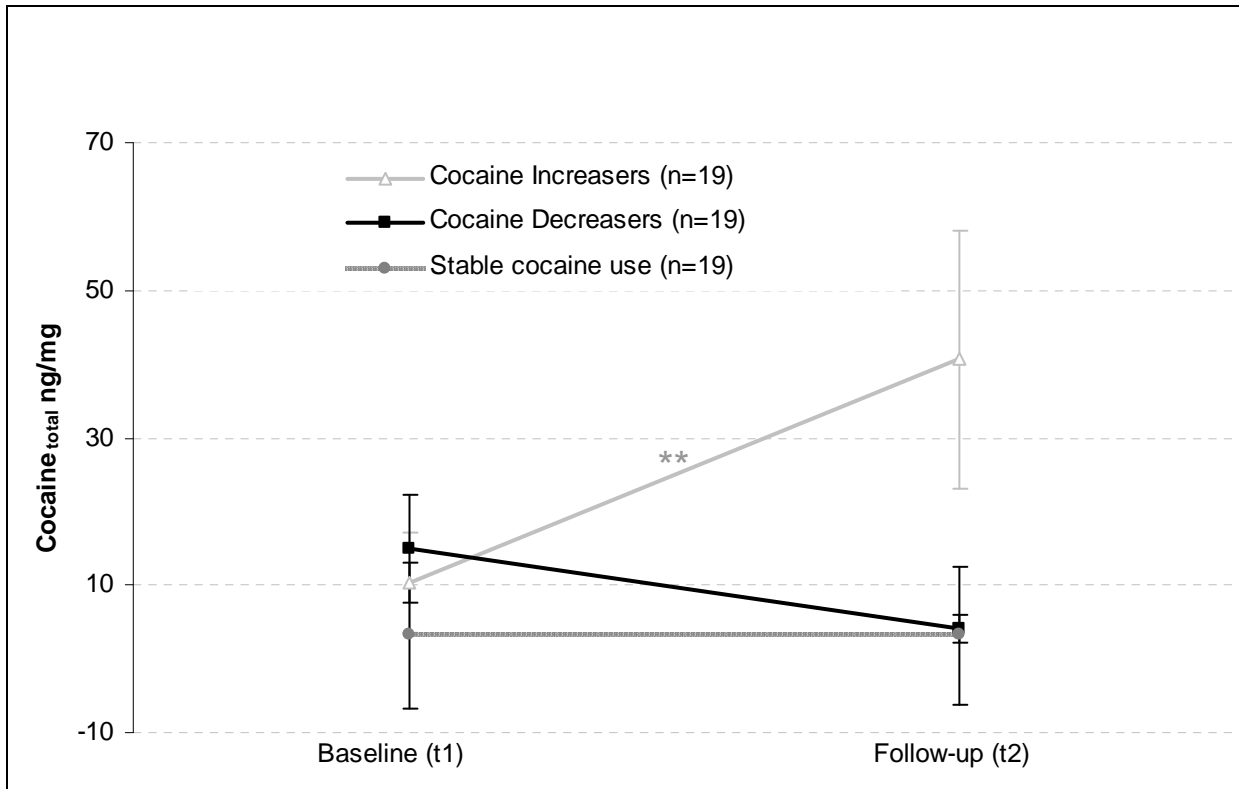

Hair concentration cocaine<sub>total</sub> (ng/mg) in cocaine user groups. Means and standard deviation. A mixed design analysis (ANOVA) showed a significant group\*test interaction effect ( $F_{2,54}=5.70, p<.10$ ). \*\*indicates a significant pairwise Sidak pre-post comparison ( $p<.10$ ).

**Figure S2.** Development of cognitive functioning in all three cocaine user groups within one year.

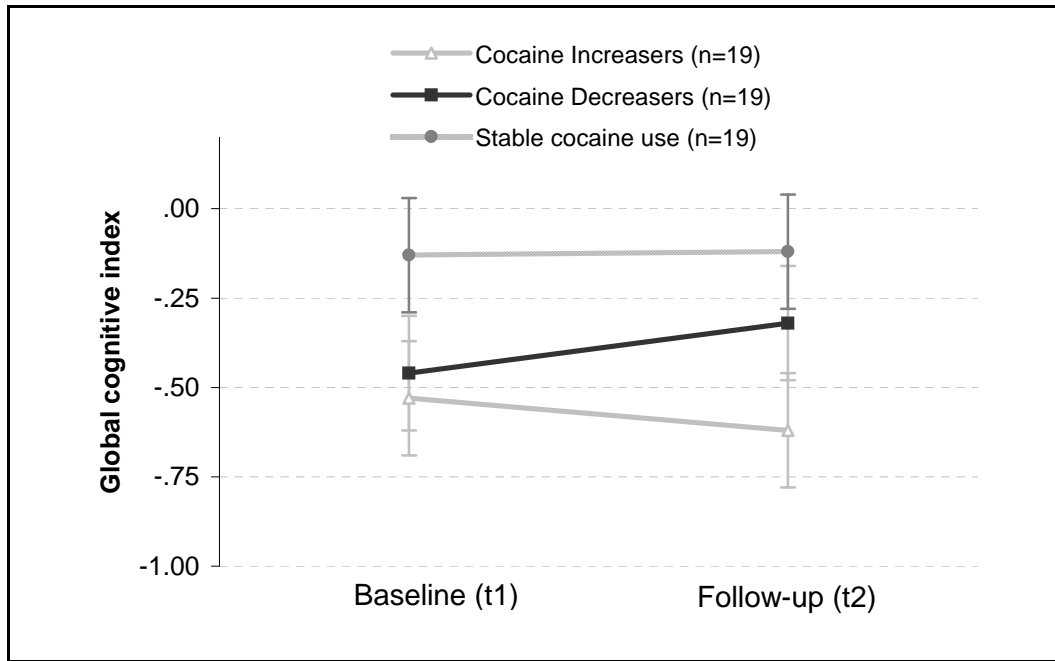

Development of cognitive functioning in cocaine user groups within one year. Z-scores and SE.

Z-score transformation was based on control group mean and standard deviation at baseline. Values at follow-up were adjusted for the test-retest effect.

A mixed design analysis (corrected for ADHD) showed a non-significant group\*time interaction effect ( $F_{2,53}=1.22, p=.30$ ).

Pairwise Sidak pre-post comparisons were non-significant for *increasers* ( $p=.41$ ), *decreasers* ( $p=.18$ ), and *stable* cocaine users ( $p=.89$ ).

As presented in Figure S1 (or more detailed in Table 1 and Table S1), the user group with *stable* cocaine use consists mainly of subjects with a comparatively low level of current cocaine use, whereas the *increaser* and *decreaser* groups consist of subjects with a substantially stronger former and/or current drug use. Consequently, GCI scores of the *stable* cocaine users are on a higher level than the GCI scores of the two other user groups.

**Figure S3.** Impact of cocaine urine toxicology status on global cognitive performance in cocaine *increasers* at baseline (t1) and 1-year follow-up (t2).

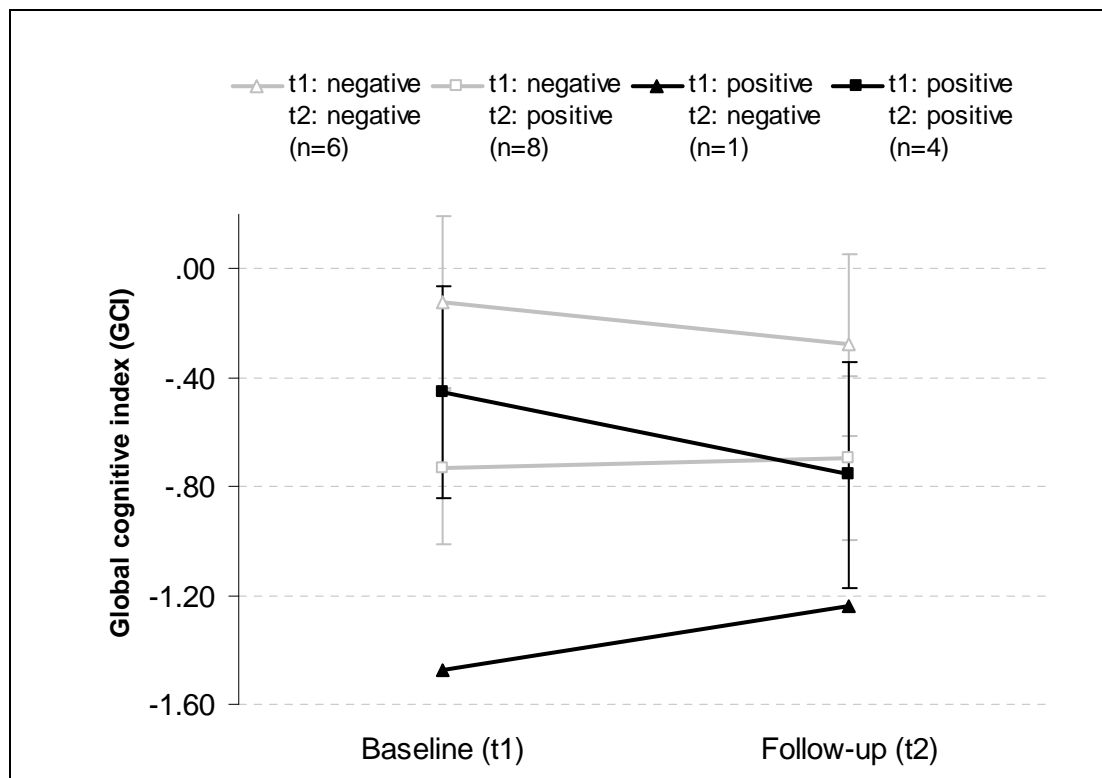

Development of cognitive functioning in cocaine user groups within one year. Z-scores and standard errors in groups stratified for urine toxicology (negative/positive) at baseline and follow-up in cocaine *increasers* (n=19).

Z-score transformation was based on control group mean and standard deviation at baseline. Values at follow-up were adjusted for the test-retest effect.

A mixed design analysis (corrected for ADHD) showed a non-significant group\*time interaction effect ( $F_{3,14}=0.75, p=.54$ ).

All pairwise Sidak pre-post comparisons were non-significant.

## References

- Beebe DW, Ris MD, Dietrich KN (2000). The relationship between CVLT-C process scores and measures of executive functioning: lack of support among community-dwelling adolescents. *J Clin Exp Neuropsychol* **22**: 779-792.
- Benedict RH, Zivadinov R, Carone DA, Weinstock-Guttman B, Gaines J, Maggiore C, *et al* (2005). Regional lobar atrophy predicts memory impairment in multiple sclerosis. *AJNR Am J Neuroradiol* **26**: 1824-1831.
- Hautzinger M, Bailer M, Worall H, Keller F (1994). *Beck-Depressions-Inventar (BDI). Bearbeitung der deutschen Ausgabe. Testhandbuch. (Beck Depression Inventory. Test manual. 2nd ed.)* Huber: Bern, Göttingen, Toronto, Seattle.
- Heatherton TF, Kozlowski LT, Frecker RC, Fagerstrom KO (1991). The Fagerstrom Test for Nicotine Dependence: a revision of the Fagerstrom Tolerance Questionnaire. *Br J Addict* **86**: 1119-1127.
- Jokeit H, Seitz RJ, Markowitsch HJ, Neumann N, Witte OW, Ebner A (1997). Prefrontal asymmetric interictal glucose hypometabolism and cognitive impairment in patients with temporal lobe epilepsy. *Brain* **120**: 2283-2294.
- Jones GM, Sahakian BJ, Levy R, Warburton DM, Gray JA (1992). Effects of acute subcutaneous nicotine on attention, information processing and short-term memory in Alzheimer's disease. *Psychopharmacology (Berl)* **108**: 485-494.
- Lehrl S (1999). *Mehrfachwahl-Wortschatz-Intelligenztest. MWT-B. 4th ed.* Spitta: Balingen.
- Lezak M, Howieson D, Loring D, Hannay H, Fischer J (2004). *Neuropsychological assessment. 4th ed.* Oxford University Press: New York.
- Morris RG, Downes JJ, Sahakian BJ, Evenden JL, Heald A, Robbins TW (1988). Planning and spatial working memory in Parkinson's disease. *J Neurol Neurosurg Psychiatry* **51**: 757-766.
- Roesler M, Retz W, Retz-Junginger P, Thome J, Supprian T, Nissen T, *et al* (2004). Instrumente zur Diagnostik der Aufmerksamkeitsdefizit-/Hyperaktivitätsstörung (ADHS) im Erwachsenenalter [Tools for the diagnosis of attention-deficit/hyperactivity disorder in adults. Self-rating behaviour questionnaire and diagnostic checklist]. *Nervenarzt* **75**: 888-895.
- Sahakian BJ, Morris RG, Evenden JL, Heald A, Levy R, Philpot M, *et al* (1988). A comparative study of visuospatial memory and learning in Alzheimer-type dementia and Parkinson's disease. *Brain* **111**: 695-718.
- Substance Abuse and Mental Health Services Administration (2008). Mandatory Guidelines for Federal Workplace Drug Testing Programs. *Federal Register* **73**: 71858-71907.
- Sussner BD, Smelson DA, Rodrigues S, Kline A, Losonczy M, Ziedonis D (2006). The validity and reliability of a brief measure of cocaine craving. *Drug Alcohol Depend* **83**: 233-237.
- Vonmoos M, Hulka LM, Preller KH, Jenni D, Baumgartner MR, Stohler R, *et al* (2013). Cognitive dysfunctions in recreational and dependent cocaine users: role of attention-deficit hyperactivity disorder, craving and early age at onset. *Br J Psychiatry* **203**: 35-43.
- Wechsler DA (1997). *Wechsler Memory Scale. Technical Manual. 3rd ed.* Psychological Cooperation: San Antonio, TX.
